# Supplementary material for: Redefining Social Support: The Effect of Digital Technologies on the Social Support of Older Workers. A Scoping Review
Source: Research Square preprint supplement (doi:10.21203/rs.3.rs-5547499/v1), 2025-09-30
Supplement: Supplementary file 1 [file 050c0bdca73dd780020c74c8.xlsx]

## Sheet: Foaie1
					General questions for all type of studies		Quantitative Non-randomized					Quantitative descriptive					Quantitative randomized controlled trials					Qualitative					Mixed methods
Rev1	Rev2	Observations	Study title	Author	S1. Are there clear research questions?	S2. Do the collected data allow to address the research questions?	Are the participants representative of the target population?	Are measurements appropriate regarding both the outcome and intervention (or exposure)?	Are there complete outcome data? Write down the computed percentage for how many participants did not answer/attrition for follow-up.	Are the confounders accounted for in the design and analysis?	During the study period, is the intervention administered (or exposure occurred) as intended?	Is the sampling strategy relevant to address the research question?	Is the sample representative of the target population?	Are the measurements appropriate?	Is the risk of nonresponse bias low? Write down the computed percentage for how many participants did not answer/attrition for follow-up	Is the statistical analysis appropriate to answer the research question?	Is randomization appropriately performed?	Are the groups comparable at baseline?	Are there complete outcome data? Write down the computed percentage for how many participants did not answer/attrition for follow-up	Are outcome assessors blinded to the intervention provided?	Did the participants adhere to the assigned intervention?	Is the qualitative approach appropriate to answer the research question?	Are the qualitative data collection methods adequate to address the research question?	Are the findings adequately derived from the data?	Is the interpretation of results sufficiently substantiated by data?	Is there coherence between qualitative data sources, collection, analysis and interpretation?	Is there an adequate rationale for using a mixed methods design to address the research question?	Are the different components of the study effectively integrated to answer the research question?	Are the outputs of the integration of qualitative and quantitative components adequately interpreted?	Are divergences and inconsistencies between quantitative and qualitative results adequately addressed?	Do the different components of the study adhere to the quality criteria of each tradition of the methods involved?
Jeroen	Anna		Work content and satisfaction before and after a reorganisation of data entry work	Åborg 1998	yes (4RQs and 5 subRQs)	yes																					Yes (there are both quali and quanti RQs ther are justification for the use of diverse methods (e.g., distribution and the time spent on different work tasks, whole day video recordings were used)	Yes (The study used quantitative questionnaires and qualitative interviews and dairies ...)	yes	Yes	no (e.g. only the Wilcoxon matched-pairs signed-ranks test was used to examine longi. changes)
Nilufer	Hande		Impact of Telework On the Perceived Work Environment of Older Workers	Arvola 2017	Yes (The research questions were:1. Can telework improve elderly employees’ well-being? 2. Does ICT usage diverge at different ages?)	No (The sample size is so small for the research questions).						No (Nonprobability judgment sampling technique is not adequate for the analysis.)	No	Yes	Can't tell	Yes
Cristina	Yang		Academic Teachers about Their Productivity and a Sense of Well-Being in the Current COVID-19 Epidemic	Bartkowiak 2022	Yes / 2 research problems mentioned	Yes / 3 very specific questions in the in-depth interview and 2 indirect questions, and 21 participants																Yes	Yes	No/ For example for the first research question that was intendend to be about knoqledge for digital competencies, the results are synthesized as productivity thematic	No / The themes found are based on just 1 comment from each participant	No / The interpretations are done superficial and conclusions are not integrated in a overall synthesis
Cristina	Yang		Teleworking—An Economic and Social Impact during COVID-19 Pandemic: A Data Mining Analysis	Belostecinic 2022	Yes / 5 research questions mentioned	yes																					yes	yes	cant tell	yes	no
Cristina	Yang		Putting brain training to the test in the workplace: a randomized, blinded, multisite, active-controlled trial.	Borness 2013
Gunilla	Gunay		**** 31 to 42 out of 42 between variables. which is accounted for 73,81-100%**** The complete data ranges between Blended Health Coaching for Work-linked Couples: Coaches’ Intervention Fidelity and Empathy Matter!	Busch 2022	YES	YES																					YES-Researchers provide a strong rationale for using a mixed methods design, noting that it helps to evaluate the intervention's process and outcomes comprehensively, capturing both quantitative outcomes and qualitative insights into the intervention’s implementation.	YES- The study effectively integrates quantitative data from controlled outcome measures with qualitative observations and self-reports to provide a comprehensive analysis of the coaching intervention's effects.	YES	YES-The study addresses potential inconsistencies between the quantitative and qualitative findings, particularly in how different levels of coach intervention fidelity might influence outcomes.	YES
Jeroen	Anna		The labour digital divide: digital dimensions of labour market segmentation	Calderón-Gómez 2020	NO (they appear as statements rather than RQs. e.g., RQ1. Penetration of digital technologies at work, in comparison to other activities of private life.	yes						yes	yes - stratified sampling method was used	Partially. The study clearly defines its variables, focusing on the extent and characteristics of digitalization in labor activities, specifically internet access and usage at work. However, measurements are not validated.	Yes. 7% non response rate	yes. The study employs a comprehensive methodological approach, utilizing univariate, bivariate, and multivariate statistical analyses to explore the correlation between digitalized labor practices and individual sociodemographic conditions, as well as hierarchical CHAID models, Principal Component Analysis, and K-means Cluster Analysis.
Jeroen	Anna		Sociotechnical issues in the implementation of imaging technology	Carayon 2000	No research questions, but have implicit hypotheses that they test (e.g., Imaging users who were involved in the implementation process, who were well informed and who received adequate training may have more positive perceptions of technology and job characteristics and may report higher quality of working life.	yes																					yes (Qualitative data were used to examine the process of technological change in the two organizations)	yes (The interview data was used to describe the implementation process of the technological change in each of the two organizations..to enrich the questionnaire-based quantitative data. The quantitative data was used for two separate comparisons ( imaging users vs. non-imaging users; agency A and agency B).	yes (e.g. The fact that imaging users also reported more quantitative workload and required skills than their non-imaging end user counterparts is interpretable in light of the qualitative data. From the interviews it became clear that the new imaging technology was putting an extra burden on the employees in the form of training time and workload	yes	yes (if omitting the type-I-error)
Gunilla	Gunay		Theorizing technological spatial intrusion for ICT enabled employee innovation: The mediating role of perceived usefulness	Chandra 2020	YES	YES	YES	YES	YES 185 responses were received initially, and 163 of them were usable, 88 %	YES-Appendix E/Common method bias analysis	YES exposure status is not changed
Cristina	Yang		Work-Related Smartphone Use at Night and Job Satisfaction: Testing a Moderated Mediation Model of Emotional Exhaustion and Organizational Dehumanization	Cheung 2022	yes	yes						yes	yes
Jeroen	Anna		A Web-Based Health Promotion Program for Older Workers: Randomized Controlled Trial	Cook 2015	yes	yes											yes	Yes (no significant differences)	No. 89% non-response rate, 80% retention follow up intervention group, X% control group	no blinding procedures were employed for either the participants or assessors	Not mentioned
Gunilla	Gunay		Teachers’ Turnover Intentions in View of Implementing a Flexible Learning System: An Extended Theory of Planned Behavior	Costan 2022	Yes/hypothesis	Yes	YES- The study is about teachers, and all participants are teachers	YES	YES: It is more than 80% The data collection tool distrubuted to 450 individuals and 426 responses were collected. 417 of them were valid. 97.89% response rate	NO	YES exposure status is not changed
Hande	Murat		Challenges and barriers to e-learning experienced by trainers and training coordinators in the Ministry of Health in Saudi Arabia during the COVID-19 crisis	DalilAlShamari 2022	Yes: Faculty members and students experience novel challenges in and barriers to online teaching and learning; however, no study has been conducted on these topics in the context of trainers and training coordinators working outside academic institutions. This study explores these challenges and barriers to e-learning experienced by trainers and training coordinators in the context of the Saudi M…	Yes.	Yes. The sample included 262 trainers and training coordinators currently working for the Saudi Ministry of Health in hospitals, primary health care centers, and training centers (including general directorates of regions and clusters) in all 13 administrative regions of the country.	Yes	52% response rate	Yes.	Yes
Gunilla	Gunay		Assessing the Impact of Conversational Artificial Intelligence in the Treatment of Stress and Anxiety in Aging Adults: Randomized Controlled Trial	Danieli 2022	YES	YES											NO-Statistical significant difference at baseline	NO	YES, 65 invited, 60 recruited, 45 remained. (69 or 75 %)	CANT TELL	CANT TELL
Jeroen	Anna		Out of Sight, Out of Mind? A Longitudinal Investigation of Smart Working and Burnout in the Context of the Job Demands–Resources Model during the COVID-19 Pandemic	DeCarlo 2022	yes (in the form of hypotheses is that ok?)	yes	Can't tell	Yes	Can't tell. Participants approached not stated. Follow-up. No. 37% dropout.	Yes	Yes
Nilufer	Murat		Identification of Factors Influencing the Adoption of Health Information Technology by Nurses Who Are Digitally Lagging: In-Depth Interview Study	DeLeeuw 2020	Yes	Yes																Yes.	Yes. They used in-depth interviews for collection of data and provides rich data to answer the research question	Yes. The researchers also proves this through examples of quotes.	Yes	Yes
Cristina	Yang		Innovative Approaches to Management of Virtual Teams Leading to Reliability and Retention	Depoo 2022	yes / 3 hypothesis	yes	yes	yes	cant tell / number of participants is not listed in the table with results	yes
Gunilla	Gunay		Acting Instead of Reacting—Ensuring Employee Retention during Successful Introduction of i4.0	Eickemeyer 2021	YES	YES	YES	CANT TELL	1025 invited, 625, of which 302 working from home, 61 %	YES, stratified sampling	NO intervention in this study
Anna	Yang		Work–Life Balance and Work from Home Experience: Perceived Organizational Support and Resilience of European Workers during COVID-19	Ferreira and Gomes (2023)	Yes	Yes	NO	Yes	Can't tell	No	Yes, have "intervention" about WFH forced
Gunilla	Gunay		Grasping Digitalization in the Working World	Friedrich 2021	YES	YES	YES	YES	YES	YES	YES-exposure to digital technologies
Cristina	Yang		Opportunities, ethical challenges, and value implications of pervasive sensing technology for supporting older adults in the work environment	Grünloh 2022
Nilufer	Hande		CHANGES IN THE ORGANIZATION OF WORK UNDER THE INFLUENCE OF COVID-19 PANDEMIC AND INDUSTRY 4.0	Habánik 2021	No	No						No (non-specified via online survey)	No	Yes	No	Yes
Cristina	Yang		Narrating ‘potential’: older knowledge workers’ anticipatory narratives about their future employment	Handley 2021	no / they describe a research goal in the introduction, but dont have specific research questions	yes																yes	yes	yes	yes	yes
Jeroen	Anna		The mediating role of coping behavior on the age-technostress relationship: A longitudinal multilevel mediation model	Hauk 2019	Yes	Yes	Can't tell	Yes	Can't tell. Follow up: No. T2 attrition 39%. T3 attrition 48%	Yes	can´t tell
Nilufer	Murat		A Study on Technology Acceptance of Digital Healthcare among Older Korean Adults Using Extended Tam (Extended Technology Acceptance Model)	KhinShoonLeiThantZin 2023	Yes	No (sample size is small)	No (because they use convenience sampling)	Yes	No follow-up	Yes	Yes
Jeroen	Anna		Living labs for a mobile app-based health program: effectiveness of a 24-week walking intervention for cardiovascular disease risk reduction among female Korean-Chinese migrant workers: a randomized controlled trial	Kim 2022 (anna)	no (but the study goal is clearly stated	yes											yes	yes except for participants’ age and menopausal status (age: p=.014, menopausal status: p=.014).	no	no	yes
Jeroen	Anna		Social Capital Mediates the Association between the ICT Usage and Well-Being of Older People in Japan: Implication for a New Design Paradigm	Kokubun 2022 (anna)	no (but a hypothesis is stated)	no (it is not a good idea to use cross-sectional to test mediation)	yes	yes	can´t say (probably yes)	yes	no
Nilufer	Hande		Digitalisation and Employees’ Subjective Job Quality in the Second Half of Working Life in Germany	Kortmann 2022	Yes	Yes	Yes (The sample size was drawn from a baseline sample of 6,002 respondents.)	Yes	25.7% response rate	Yes	Yes
Jeroen	Anna		Older and Younger Job Seekers' Impression Management on LinkedIn Similar Strategies, Different Outcomes	Krings 2021 (anna/jeroen)	no (but hypotheses are clearly stated)	yes	yes (younger 1986-1992; older 1953-1967) CHANGE TO Can't tell: The study does not provide sufficient information to determine if the sample is representative of the target population of job seekers on LinkedIn	yes	can´t say, there no mention about the number of people contacted to participate in this study.	yes	no
Jeroen	Anna	AGE IS NOT ANALYSED NOR IS THE AGE RANGE OF SAMPLE STATED IN PAPER. i'D EXCLUDE IT TO BE CONSISTENT	Job insecurity and technology acceptance: an asymmetric dependence	Krutova 2022
Nilufer	Murat		Enhancing Employee Agility Through Information Technology Competency: An Empirical Study of China	Lai 2021	Yes : The objective of present research is to scrutinize the association among IT competency, perceived task structure, and employee’s agility	Yes: To determine the sample size, we followed the stratified sampling approach, which is significantly consistent with the method, as it has diversity and Cochran’s formula. The sample of the study has indicated the adequate level of representative as a whole, having reliability 90 and denotes the proper consistency of questions of all the constructs.						No: Because the researchers tried to arrive at an outcome for the whole of China, However, they only collected data from eight companies and we do not know the specifics of how these companies were selected.	No: Because the researchers tried to arrive at an outcome for the whole of China, However, they only collected data from eight companies and we do not know the specifics of how these companies were selected.	No: Not sufficient	No: "We distributed 265 questionnaires among employees, during the period that extended from December 2017 to January 2018, and received 200 responses, in which 33 were found inadequate such as missing information or filled improperly."	Yes: Statistical method employed is relevant
Nilufer	Murat		Training in Digital Skills—The Perspective of Workers in Public Sector	Lopes 2023	Yes (Hypotheses are clearly mentioned).	No (non-randomized sampling was used without enough sample size).	No (non-randomized sampling was used without enough sample size).	Yes	Can't tell	Yes	Yes
Hande	Murat		How Social Media Use at Work Affects Improvement of Older People's Willingness to Delay Retirement During Transfer From Demographic Bonus to Health Bonus: Causal Relationship Empirical Study	Ma 2021	Yes: All hypothesis are clearly put forth.	Yes.	Yes: The formal questionnaire respondents (staff older than 55 years) were obtained through the Bengbu social security office, and they obtained the questionnaire from social media from June to July 2018. A total of 1500 questionnaires were issued, and 1291 were returned, giving a return rate of 86.1%. After eliminating invalid questionnaires (those that had many blank answers and a high repetiti…	Yes:	68% is the response rate	Yes.	Yes
Nilufer	Murat		Usage of ICT among Social Educators—An Analysis of Current Practice in Spain	Martínez-Pérez 2023	Yes (The objective of this work is to ascertain the uses of ICT among social educators...)	No (non-randomized sampling was used without enough sample size).																					Yes	Yes	Yes	No	Yes
Hande	Murat		The Role of Knowledge Management Infrastructure in Enhancing Job Satisfaction: A Developing Country Perspective	Masa'deh 2019	Yes: This study thus focuses on the dimensions of knowledge management infrastructure as a means of influencing the job satisfaction of academic staff (i.e., knowledge workers) operating in universities in Jordan. Its aim is toexplore how the KM infrastructure dimensions (culture, structure, technology) affect their job satisfaction, and also to examine how the other factors (gender, age, academi…	No. The data comes from only one university.	No: The data comes from only one university and is not resprepresentative of Jordanian academia.	Yes.	61.4% response rate	Yes.	Yes
Nilufer	Hande		Learning-by-Doing Safety and Maintenance Practices: A Pilot Course	Mazzuto 2022	Yes	Yes						Can't tell	Can't tell	Yes	Yes	No
Gunilla	Gunay		Promoting Psychological Well-Being at Work by Reducing Stress and Improving Sleep: Mixed-Methods Analysis	Meyer 2018	YES	YES																					YES	YES	YES	YES	YES
Gunilla	Gunay		The challenges of undergraduate online learning experienced by older workers in career transition	Meyers 2017	YES	YES																YES, phenomenological	YES	CANT TELL, NO PROOF OF ANALYSIS PROCESS	CANT TELL, NO PROOF OF ANALYSIS PROCESS	YES
Nilufer	Hande		Test@Work Texts: Mobile Phone Messaging to Increase Awareness of HIV and HIV Testing in UK Construction Employees during the COVID-19 Pandemic	Middleton 2020	Yes	Yes																					Yes	Yes	Yes	No	Yes
Nilufer	Murat		Designing a persuasive physical activity application for older workers: understanding end-user perceptions	Mohadis 2016	Yes	Yes																Yes	Yes	Yes	Yes	Yes
Gunilla	Gunay		Technology Acceptance and Leadership 4.0: A Quali-Quantitative Study	Molino 2021	YES	YES.																.					YES	YES	YES	YES	YES
Nilufer	Murat		Virtual enclaves: the influence of alumni email lists on the workspaces of transnational software engineers	MONTGOMERY 2007	No	Yes																Can't tell	Can't tell	Yes	Yes	Yes
Nilufer	Hande		Work-From-Home in the New Normal: A Phenomenological Inquiry into Employees’ Mental Health	MumtazAliMemon 2023	Yes (The key objectives of this research were to...)	Yes																Yes	Yes	Yes	Can't tell	Can't tell
Nilufer	Murat		Open Innovation in the ICT Industry: Substantiation from Poland	Ober 2022	Yes (The following research questions were posed ...)	Yes (n=402)	Yes	Yes	The response rate was 6.7%.	Yes	Yes
Jeroen	Anna		COVID-19 Anxiety and Wellbeing at Work in Finland during 2020–2022: A 5-Wave Longitudinal Survey Study	Oksanen 2023	no (but hypotheses are clearly stated)	yes	yes	yes	No. Response rate for baseline survey (T1) 28%. Lost during follow ups (T5): 41%	yes	yes
Cristina	Yang		Telework: A Social and Emotional Perspective of the Impact on Employees’ Wellbeing in the COVID-19 Pandemic	Petcu 2023	Yes, 6 research questions mentioned	Yes	yes	no/ measures are not described enough and they are all mixed and taken from different type of measures	cant tell/ number of participants included in descriptive analysis not stated and neither in the regression models	no	Cant tell
Hande	Murat		Sensitive Men and Hardy Women: How Do Millennials, Xennials and Gen X Manage to Work from Home?	Raišienė 2021	Yes: All research questions are clearly stated.	No.						No. The data is collected only by web-based survey. It cannot represent all Lithuanian remote workers.	No.	Yes. The surveys conducted are comprehensive	No.	No. There is no enough analysis
Nilufer	Hande		Occupational Stress-Induced Consequences to Employees in the Context of Teleworking from Home: A Preliminary Study	Raišienė 2023	Yes ( Thus, our preliminary study, which aimed to explore the effects of occupational stress base ...)	Yes	No (accessible sampling was used)	Yes	No follow-up	Yes	Yes
Cristina	Yang		The introduction of care robots as a leadership challenge in home care facilities in Finland	Rantanen 2022	Yes, specific research questions and hypotheses outlined	Yes	yes	yes/ all measures are described adequately	yes / 95%	yes	Cant tell
Hande	Murat		A Digital Coach Promoting Healthy Aging among Older Adults in Transition to Retirement: Results from a Qualitative Study in Italy	Santini 2020	Yes	No																Yes	No: The study only involves participants from one organization, which works in the realm of gerontology. While there are three categories of participants, the diversity of experiences and backgrounds was not ensured to drive outcomes for older population	Yes	Yes	Yes: To collect data they used focus group discussions, and they used framework analysis to analyze the data. They interpreted their results against the previous literature.
Hande	Murat		User Requirements Analysis of an Embodied Conversational Agent for Coaching Older Adults to Choose Active and Healthy Ageing Behaviors during the Transition to Retirement: A Cross-National User Centered Design Study	Santini 2021	Yes	yes																Yes. The approach gives detailed information to answer the research question and sample includes participants from three countries	Yes. They conducted two waves of focus group discussions and a follow-up telephone interview to collect data in three countries.	Yes. Their findings rest on the data and they illustrate it using appropriate quotes	Yes	Yes
Hande	Murat		The Impact of Digital Coaching Intervention for Improving Healthy Ageing Dimensions among Older Adults during Their Transition from Work to Retirement	Santini 2023	Yes.	Yes.																					Yes	Can't tell	Yes	Yes	No. There is no sufficient statistical analysis
Cristina	Yang		Resilience during Crisis and the Role of Age: Involuntary Telework during the COVID-19 Pandemic	Scheibe 2022	Yes, 2 research questions mentioned	Yes																					yes	no/ the quantative and qualitative analysis are separately, some of them answer different type of research goals	no/ the quantitative and qualitative outputs are presented separately	cant tell	yes/ although resilience measure is not that good
Cristina	Yang		A Digital Health Coach for Younger Seniors - User Centred Requirements Collection	Schmied 2020	no / just a general goal of research	yes																yes	yes / the guidelines for questions are described	yes / they identified four functions for digital coach and the impact of digital tools over participants	no / results are described, but just 1 quotation for each theme was identified	no / there is coherence between sources and collection, but the interpretation is lacking examples of what participants told in the focus-group.
Hande	Murat		Coaching Robots for Older Seniors: Do They Get What They Expect? Insights from an Austrian Study	Schneider 2023	Yes	Yes						Can't tell	Can't tell	Yes	Yes	No
Cristina	Yang		Communion, Care, and Leadership in Computer-Mediated Learning during the Early Stage of COVID-19	Sederevičiūtė-Pačiauskienė 2021	yes / 1 general research question	yes / the study is done during pandemic time so qualitative data collection ensures insight																yes / they used in-depth interviews	no / just one question is mentioned from the interview and a mention that clarifications were asked, but no examples of any other questions	yes / all of the themes are described in details and supported with multiple examples from what participants told in the interviews	yes / there are many examples from what participants told in the interviews	yes / there is a detailed analysis of data collected
Cristina	Yang	no digital tools	Exploring the Direct and Indirect Influence of Perceived Organizational Support on Affective Organizational Commitment	Silva 2022	yes / they have 3 hypothesis	yes / data are collected through online questionnaire	yes / the study is about workers and participants are workers	no / the measures are described inappropriate. they did took items from preexisting instruments, but they fail to describe the measures theoretically and appropiate	cant tell / they did not mention the number of participants in the descriptive and correlational analysis and neither in the rest of the analysis
Nilufer	Murat		Barriers and Facilitators to the Adoption of Mobile Health Among Health Care Professionals From the United Kingdom: Discrete Choice Experiment	Simon 2020	Can't tell	Yes																					Yes	No	No	No	No
Jeroen	Anna		Impact of Using Social Media Networks on Individual Work-Related Outcomes	Taboroši 2022	yes	yes						Given the research focus on social media usage, convenience sampling is suitable because it targets individuals who are accessible and willing to participate in an online survey	Can't tell	yes	Can't tell	yes
Hande	Murat		Digital knowledge sharing and creative performance: Work from home during the COVID-19 pandemic	Tonnessen 2021	Yes (The three main research questions (RQs) investigated by the current study are: ... )	No (Sample size is small)																					Yes (Qualitative data were necessary to obtain an in-depth understanding of opinions and attitudes to the future of work)	Yes	Yes	No (WHY??)	Yes
Cristina	Yang		Sustainable employability for older workers: An explorative survey of belgian companies	Verbrugghe 2016	no / no hypothesis, just a general aim of the study	yes /						no / no details about sampling	yes / yes, they have a varity of age groups withing the target population	yes / they reflect general questions about sustainable employability	no /Ten percent of recipients (n = 2133) opened the e-mail, and within this group, 37.0 % (n = 790) completed the questionnaire (convenience sample).	yes / percentages were described for each question
Jeroen	Anna		Risk factors for digital stress in German public administrations	Wrede 2021 first names: sammy joelle shirley	no (but hypotheses are clearly stated)	yes						Yes. Despite being non-random, employees directly involved in digitization efforts were targeted, aligning with the study's objective to examine digital stress in public administrations.	Can't tell	yes	no. 46% non-response	yes
Gunilla	Gunay	Option for responses: "yes", "no", "can't tell", "comments"	Work–Life Balance and Work from Home Experience: Perceived Organizational Support and Resilience of European Workers during COVID-19				YES:The target population is workers who exposed to digital tools and in this paper Employees by third parties and self-employed without/with employees who from from home during COVID-19 are the participants	NO: "Are measurements appropriate regarding both the outcome and intervention (or exposure)?", as we discussed, one of the exposures is a measurement of social (organisational) support (based on 2 items). It is the treatment, however, not the outcome. As they state in the abstract, working from home is actually a mediator for work-life balance, which is the outcome variable!.	CANT TELL: The study used responses from the second wave and the paper only mentions "24,144 valid responses", Moreover, they only ended up using "14,298 valid responses" due to other filters but don't mention the number of "invalid responses". As respondents were also recruited using snowball sampling methods and social media advertisements, ie, they had a non-probabilistic sample,	NO; not mentioned in the paper	YES exposure status is not changed
		To fill in with the abovementioned options only the questions corresponding to the study's design
		Other boxes (correspond to the other study designs) to be filled in with NA (not applicable)

## Sheet: scores
PUB YEAR			S1. Are there clear research questions?	S2. Do the collected data allow to address the research questions?	S1 & S2 (0/50/100%)	Quantitative Non-randomized	score (20% per item)	Quantitative descriptive	score	Quantitative randomized controlled trials	score	Qualitative	score	Mixed methods	score
1998	Work content and satisfaction before and after a reorganisation of data entry work	Åborg et al. 1998	Yes (4RQs and 5 subRQs)	yes	100									1	100
2000	Sociotechnical issues in the implementation of imaging technology	Carayon and Karsh 2000	No research questions, but have implicit hypotheses that they test (e.g., Imaging users who were involved in the implementation process, who were well informed and who received adequate training may have more positive perceptions of technology and job characteristics and may report higher quality of working life.	yes	50									1	100
2016	Designing a persuasive physical activity application for older workers: understanding end-user perceptions	Mohadis et al. 2016	Yes	Yes	100							1	100
2016	Sustainable employability for older workers: An explorative survey of belgian companies	Verbrugghe et al. 2016	no / no hypothesis, just a general aim of the study	yes /	50			1	60
2017	Impact of Telework On the Perceived Work Environment of Older Workers	Arvola 2017	Yes (The research questions were:1. Can telework improve elderly employees’ well-being? 2. Does ICT usage diverge at different ages?)	No (The sample size is so small for the research questions).	50			1	40
2017	The challenges of undergraduate online learning experienced by older workers in career transition	Meyers and Bagnall 2016	Yes	YES	100							1	60
2019	The mediating role of coping behavior on the age-technostress relationship: A longitudinal multilevel mediation model	Hauk et al. 2019	Yes	Yes	100	1	40
2020	The labour digital divide: digital dimensions of labour market segmentation	Calderón-Gómez et al. 2020	NO (they appear as statements rather than RQs. e.g., RQ1. Penetration of digital technologies at work, in comparison to other activities of private life.	yes	50			1	90
2020	Theorizing technological spatial intrusion for ICT enabled employee innovation: The mediating role of perceived usefulness	Chandra et al. 2020	YES	YES	100	1	100
2020	Identification of Factors Influencing the Adoption of Health Information Technology by Nurses Who Are Digitally Lagging: In-Depth Interview Study	DeLeeuw et al. 2020	Yes	Yes	100							1	100
2020	Test@Work Texts: Mobile Phone Messaging to Increase Awareness of HIV and HIV Testing in UK Construction Employees during the COVID-19 Pandemic	Middleton et al. 2020	Yes	Yes	100									1	80
2020	A Digital Health Coach for Younger Seniors - User Centred Requirements Collection	Schmied et al. 2020	no / just a general goal of research	yes	50							1	60
2021	CHANGES IN THE ORGANIZATION OF WORK UNDER THE INFLUENCE OF COVID-19 PANDEMIC AND INDUSTRY 4.0	Habánik et al. 2021	No	No	0			1	40
2021	Narrating ‘potential’: older knowledge workers’ anticipatory narratives about their future employment	Handley and Outer 2020	no / they describe a research goal in the introduction, but dont have specific research questions	yes	50							1	100
2021	Enhancing Employee Agility Through Information Technology Competency: An Empirical Study of China	Lai et al. 2021	Yes : The objective of present research is to scrutinize the association among IT competency, perceived task structure, and employee’s agility	Yes: To determine the sample size, we followed the stratified sampling approach, which is significantly consistent with the method, as it has diversity and Cochran’s formula. The sample of the study has indicated the adequate level of representative as a whole, having reliability 90 and denotes the proper consistency of questions of all the constructs.	100			1	20
2021	How Social Media Use at Work Affects Improvement of Older People's Willingness to Delay Retirement During Transfer From Demographic Bonus to Health Bonus: Causal Relationship Empirical Study	Ma et al. 2021	Yes: All hypothesis are clearly put forth.	Yes.	50	1	80
2021	Technology Acceptance and Leadership 4.0: A Quali-Quantitative Study	Molino et al. 2021	YES	YES.	100									1	100
2021	User Requirements Analysis of an Embodied Conversational Agent for Coaching Older Adults to Choose Active and Healthy Ageing Behaviors during the Transition to Retirement: A Cross-National User Centered Design Study	Santini et al. 2021	Yes	yes	100							1	100
2021	Communion, Care, and Leadership in Computer-Mediated Learning during the Early Stage of COVID-19	Sederevičiūtė-Pačiauskienė et al. 2021	yes / 1 general research question	yes / the study is done during pandemic time so qualitative data collection ensures insight	100							1	80
2021	Digital knowledge sharing and creative performance: Work from home during the COVID-19 pandemic	Tonnessen et al. 2021	Yes (The three main research questions (RQs) investigated by the current study)	No (Sample size is small)	50									1	80
2021	Risk factors for digital stress in German public administrations	Wrede et al. 2021	no (but hypotheses are clearly stated)	yes	50			1	60
2022	Challenges and barriers to e-learning experienced by trainers and training coordinators in the Ministry of Health in Saudi Arabia during the COVID-19 crisis	Al Shamari 2022	Yes: Faculty members and students experience novel challenges in and barriers to online teaching and learning; however, no study has been conducted on these topics in the context of trainers and training coordinators working outside academic institutions. This study explores these challenges and barriers to e-learning experienced by trainers and training coordinators in the context of the Saudi M…	Yes.	100	1	80
2022	Academic Teachers about Their Productivity and a Sense of Well-Being in the Current COVID-19 Epidemic	Bartkowiak et al. 2022	Yes / 2 research problems mentioned	Yes / 3 very specific questions in the in-depth interview and 2 indirect questions, and 21 participants	100							1	40
2022	Teleworking—An Economic and Social Impact during COVID-19 Pandemic: A Data Mining Analysis	Belostecinic et al. 2022	Yes / 5 research questions mentioned	yes	100									1	60
2022	Blended Health Coaching for Work-linked Couples: Coaches’ Intervention Fidelity and Empathy Matter!	Busch et al. 2022	Yes	YES	100									1	100
2022	Assessing the Impact of Conversational Artificial Intelligence in the Treatment of Stress and Anxiety in Aging Adults: Randomized Controlled Trial	Danieli et al. 2022	Yes	YES	100					1	20
2022	Out of Sight, Out of Mind? A Longitudinal Investigation of Smart Working and Burnout in the Context of the Job Demands–Resources Model during the COVID-19 Pandemic	DeCarlo et al. 2022	Yes (in the form of hypotheses)	yes	100	1	60
2022	Living labs for a mobile app-based health program: effectiveness of a 24-week walking intervention for cardiovascular disease risk reduction among female Korean-Chinese migrant workers: a randomized controlled trial	Kim et al.2022	No (but the study goal is clearly stated	yes	50					1	60
2022	Learning-by-Doing Safety and Maintenance Practices: A Pilot Course	Mazzuto et al. 2022	Yes	Yes	100			1	40
2022	Open Innovation in the ICT Industry: Substantiation from Poland	Ober 2022	Yes (research questions were posed)	Yes (n=402)	100	1	100
2022	The introduction of care robots as a leadership challenge in home care facilities in Finland	Rantanen et al. 2021	Yes, specific research questions and hypotheses outlined	Yes	100	1	80
2022	Resilience during Crisis and the Role of Age: Involuntary Telework during the COVID-19 Pandemic	Scheibe et al. 2022	Yes, 2 research questions mentioned	Yes	100									1	40
2022	Impact of Using Social Media Networks on Individual Work-Related Outcomes	Taboroši et al. 2022	Yes	yes	100			1	60
2023	Work–Life Balance and Work from Home Experience: Perceived Organizational Support and Resilience of European Workers during COVID-19	Ferreira and Gomes (2023)	Yes	yes	100	1	40
2023	Training in Digital Skills—The Perspective of Workers in Public Sector	Lopes et al. 2023	Yes (Hypotheses are clearly mentioned).	No (non-randomized sampling was used without enough sample size).	50	1	60
2023	Usage of ICT among Social Educators—An Analysis of Current Practice in Spain	Martínez-Pérez et al. 2023	Yes (The objective of this work is to ascertain the uses of ICT among social educators)	No (non-randomized sampling was used without enough sample size).	50									1	80
2023	Work-From-Home in the New Normal: A Phenomenological Inquiry into Employees’ Mental Health	Memon et al. 2023	Yes (key objectives)	Yes	100							1	60
2023	COVID-19 Anxiety and Wellbeing at Work in Finland during 2020–2022: A 5-Wave Longitudinal Survey Study	Oksanen et al. 2023	No (but hypotheses are clearly stated)	yes	50	1	80
2023	Telework: A Social and Emotional Perspective of the Impact on Employees’ Wellbeing in the COVID-19 Pandemic	Petcu et al. 2023	Yes, 6 research questions mentioned	Yes	100	1	20
2023	Occupational Stress-Induced Consequences to Employees in the Context of Teleworking from Home: A Preliminary Study	Raišienė et al. 2023	Yes ( Thus, our preliminary study, which aimed to explore the effects of occupational stress)	Yes	100	1	60
2023	The Impact of Digital Coaching Intervention for Improving Healthy Ageing Dimensions among Older Adults during Their Transition from Work to Retirement	Santini et al. 2023	Yes	Yes.	100									1	60
2023	Coaching Robots for Older Seniors: Do They Get What They Expect? Insights from an Austrian Study	Schneider and Bousbiat 2023	Yes	Yes	100			1	40
2023	A Study on Technology Acceptance of Digital Healthcare among Older Korean Adults Using Extended Tam (Extended Technology Acceptance Model)	Zin et al. 2023	Yes	No (sample size is small)	50	1	60
					81.3953	13	66.1538	9	50	2	40	9	77.7778	10	80
							During the study period, is the intervention administered (or exposure occurred) as intended?		Is the risk of nonresponse bias low? Write down the computed percentage for how many participants did not answer/attrition for follow-up
