# Supplementary material for: Redefining Social Support: The Effect of Digital Technologies on the Social Support of Older Workers. A Scoping Review
Source: Research Square preprint supplement (doi:10.21203/rs.3.rs-5547499/v1), 2025-09-30
Supplement: Supplementary file 2 [file 5a30f956fc273e6647590dc7.xlsx]

## Sheet: Countries
Country	Number of studies	N		Legend title:
Australia	1	1		Number of studies (countries)
Austria	5	1		1 (23)	23
Belgium	2	1		2 (9)	9
Bosnia and Herzegovina	1	1		3 (5)	5
Bulgaria	1	1		4 or more (4)	4
China	2	1
Croatia	2	1		Interpretation: e.g. 23 countries appear once, 9 countries appear in two studies, 5 in three studies and 4 in 4 or more (maximum is Italy which appears in 7 studies)
Cyprus	1	1
Czechia	1	1
Denmark	1	1
Estonia	2	1
Finland	3	1
France	1	1
Germany	4	1
Greece	1	1		Appears in n studies
Hungary	1	1		Etiquetas de fila	Suma de N	countries
Ireland	1	1		1	23
Italy	7	1		2	9
Latvia	1	1		3	5
Lithuania	3	1		4	1
Luxembourg	1	1		5	2
Malaysia	1	1		7	1
Malta	1	1		Total general	41
Montenegro	1	1
Netherlands	5	1
North Macedonia	1	1
Norway	1	1		Country not specified	1
Pakistan	1	1
Poland	3	1
Portugal	2	1
Romania	3	1
Saudi Arabia	1	1
Serbia	1	1
Slovakia	2	1
Slovenia	1	1
South Korea	2	1
Spain	3	1
Sweden	2	1
Switzerland	1	1
UK	2	1
USA	1	1
